# Supplementary material for: Electronic structure and magnetothermal properties of the Janus VSeTe monolayer manipulated by carrier doping
Source: Royal Society of Chemistry journal article supplement (doi:10.1039/d5cp03517a), 2026-01-01
Supplement: d5cp03517a2.pdf [file d5cp03517a2.pdf]

# Electronic structure and magnetothermal property of the Janus VSeTe monolayer manipulated by carrier doping

Yue Yang<sup>1</sup>, Shuai-Kang Zhang<sup>1</sup>, Jun-Kang Jiang<sup>1</sup>, Cui-E Hu<sup>2,\*</sup>,

Hua-Yun Geng<sup>3</sup>, Xiang-Rong Chen<sup>1</sup>

<sup>1</sup> Institute of Atomic and Molecular Physics, Sichuan University, Chengdu 610065, China;

<sup>2</sup> College of Physics and Electronic Engineering, Chongqing Normal University, Chongqing 401331, China;

<sup>3</sup> National Key Laboratory for Shock Wave and Detonation Physics Research, Institute of Fluid Physics, CAEP, Mianyang 621900, China

**ABSTRACT:** Two-dimensional (2D) ferromagnetic materials with high magnetic crystalline anisotropy energy and high Curie temperature are in highly demand for magnetic storage devices. In this work, we employ first-principles calculations and Monte Carlo simulations to systematically investigate the crystalline structure, electronic, and magnetic properties of the Janus VSeTe monolayer under different carrier concentrations. It is found that, under appropriate carrier doping, the Janus VSeTe monolayer undergoes a transition from a semiconductor to a half-metal with 100% spin polarization. The obtained magneto crystalline anisotropy energy is 1157.72  $\mu\text{eV}$ , and the easy magnetic axis undergoes a transition from in-plane to out-of-plane under hole doping. In addition, the Janus VSeTe monolayer exhibits a valley splitting of 86  $\text{meV}$  and a Curie temperature of 454 K. Under hole doping, the valley

---

\* Corresponding author. E-mail: cuiehu@cqnu.edu.cn

splitting increases to  $110\text{ meV}$  and the Curie temperature rises to 510 K. The coercivity calculated from the hysteresis loop is 0.13 T, and its hysteresis loss is low, showing its rapid response to external magnetic fields. Our work demonstrates the broad application potential of the Janus VSeTe monolayer in spintronic devices and provides theoretical support for future experiments.

**Keywords:** VSeTe monolayer; Ferromagnetism; Spintronics; Magnetothermal properties; First-principles calculations; Monte Carlo simulations

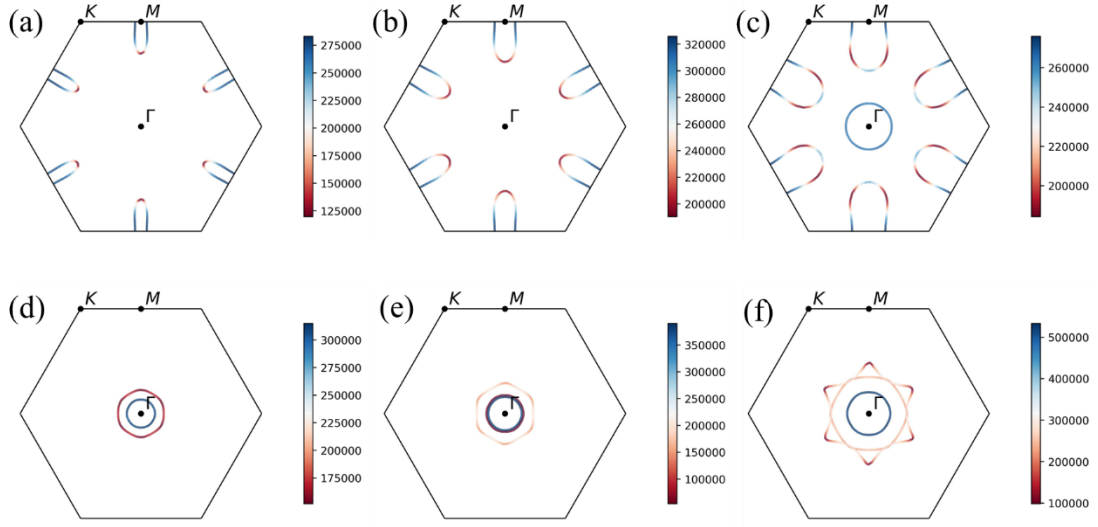

**Fig. S1** (Color online) Fermi velocity projected Fermi surface under different carrier concentrations. (a)  $n = 0.02$ . (b)  $n = 0.04$ . (c)  $n = 0.1$ . (d)  $n = -0.02$ . (e)  $n = -0.04$ . (f)  $n = -0.1$ .

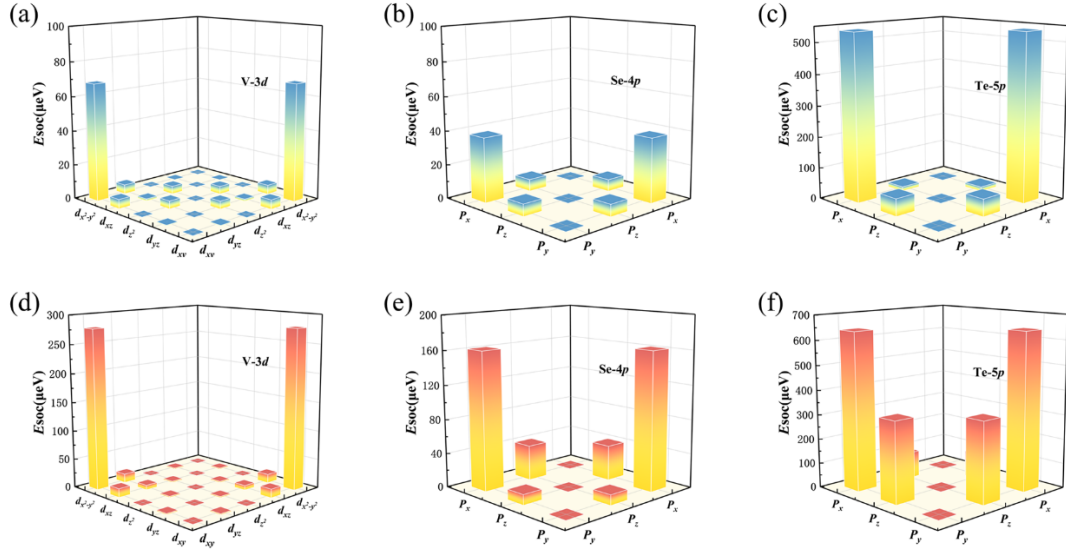

**Fig. S2** (Color online) (a)–(c) The contribution of SOC deriving from the 5p of Te, 4p of Se and 5p of Te when the carrier concentrations are up to  $7.293 \times 10^{13} \text{ cm}^{-2}$  (0.08 electrons per atom). (d)–(f) The contribution of SOC deriving from the 5p of Te, 4p of Se and 5p of Te when the carrier concentrations are up to  $7.293 \times 10^{13} \text{ cm}^{-2}$  (0.08 holes per atom).

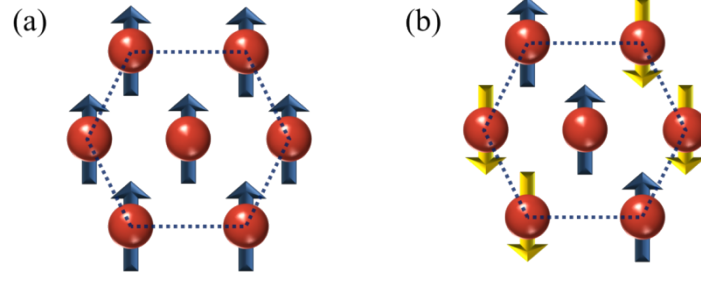

**Fig. S3** (Color online) (a) FM configuration of the Janus VSeTe monolayer. (b) AFM configuration of the Janus VSeTe monolayer.

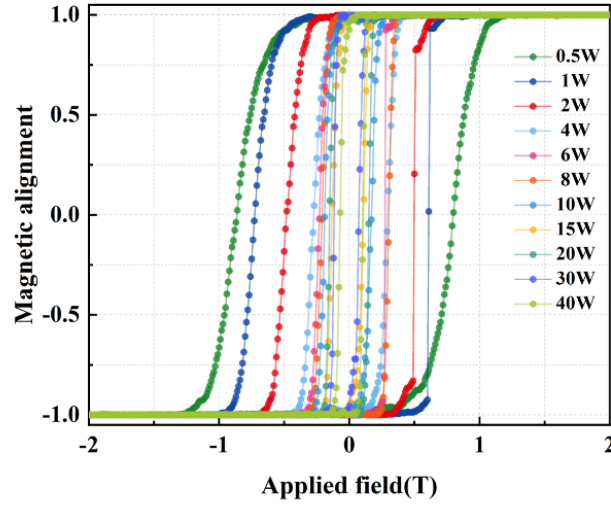

**Fig. S4** (Color online) The lagging loop changes with the number of relaxation steps.

**Table SI** Energy differences between FM and AFM states, the variation in bond angles  $\theta(^{\circ})$ , and bond lengths  $d$  ( $\text{\AA}$ ) of the Janus VSeTe monolayer at different doping concentrations.

| Carrier  | $\Delta_{AFM-FM}$ | $\theta_{V-Se-V}$ | $\theta_{V-Te-V}$ | $d_{V-Se}$       | $d_{V-Te}$       | $d_{V-V}$        |
|----------|-------------------|-------------------|-------------------|------------------|------------------|------------------|
| per atom | (meV)             | ( $^{\circ}$ )    | ( $^{\circ}$ )    | ( $\text{\AA}$ ) | ( $\text{\AA}$ ) | ( $\text{\AA}$ ) |
| -0.04    | 0.262             | 87.075            | 77.957            | 2.495            | 2.732            | 3.437            |
| -0.02    | 0.391             | 87.013            | 78.325            | 2.496            | 2.721            | 3.437            |
| 0.00     | 0.183             | 87.010            | 78.701            | 2.496            | 2.710            | 3.437            |
| 0.02     | 0.154             | 86.973            | 78.857            | 2.497            | 2.706            | 3.437            |
| 0.04     | 0.118             | 86.948            | 79.000            | 2.498            | 2.702            | 3.437            |
